# Supplementary material
Source: publisher figshare collection journal article supplement (https://asha.figshare.com/articles/dataset/_/5895988)

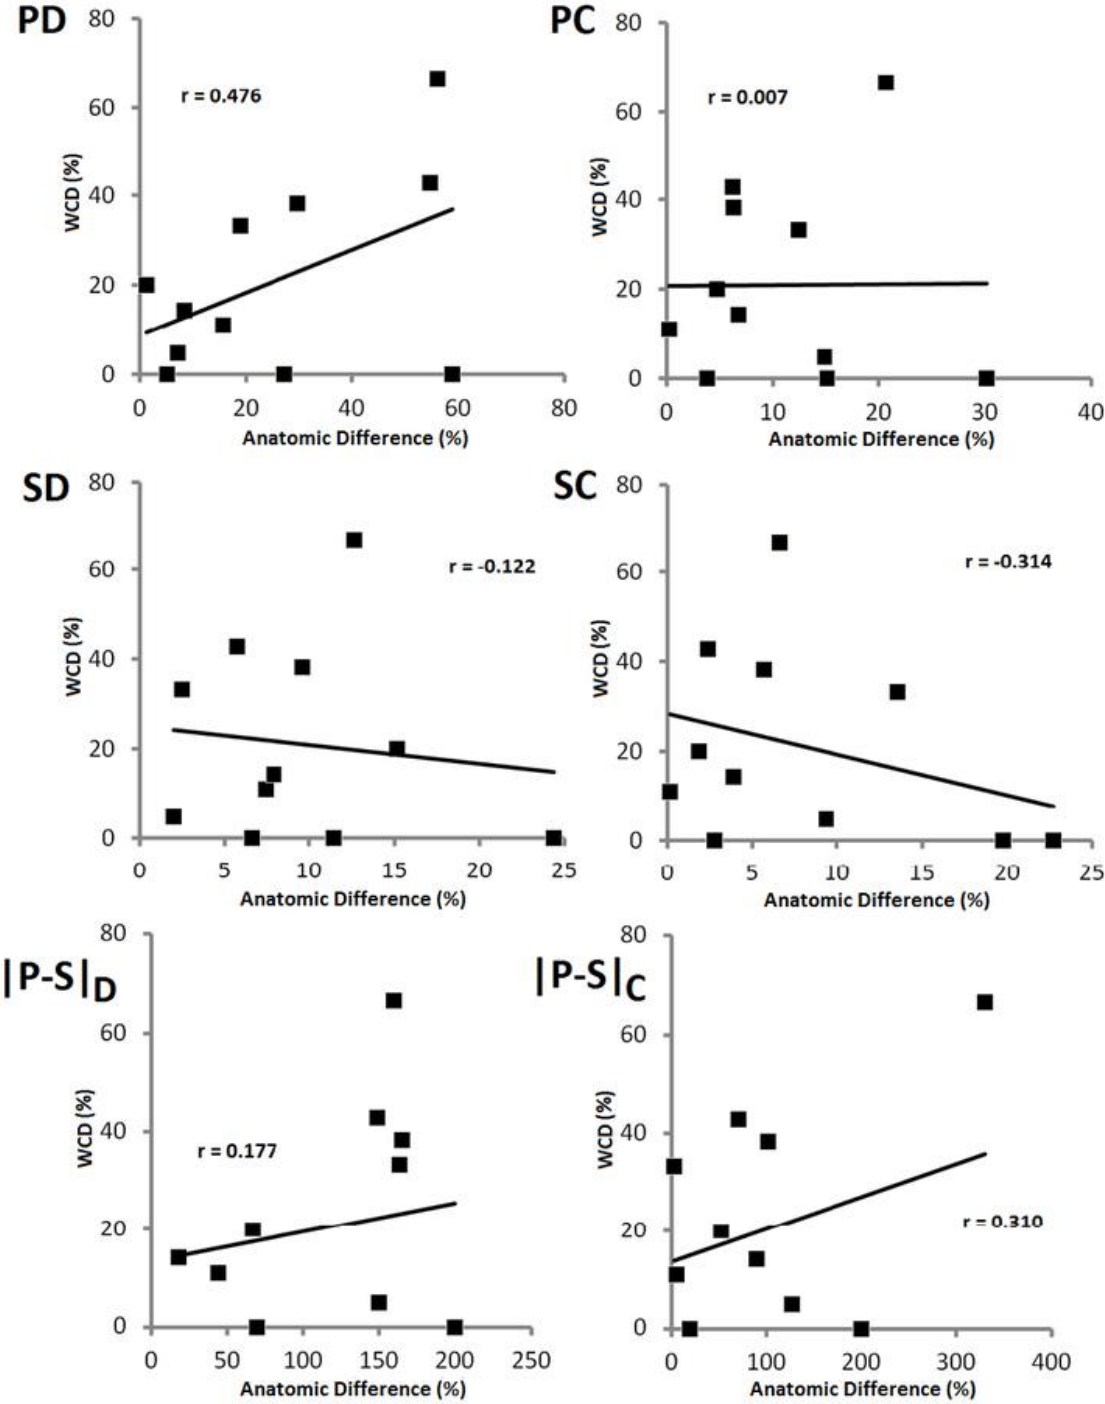

**Bivariate Fit of Warm irrigation (Caloric weakness) By Proctor Diameter**

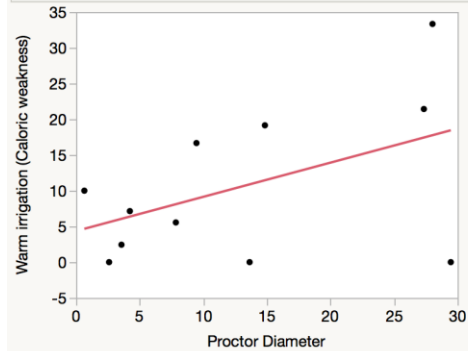

**Bivariate Fit of Warm irrigation (Caloric weakness) By Proctor Circumference**

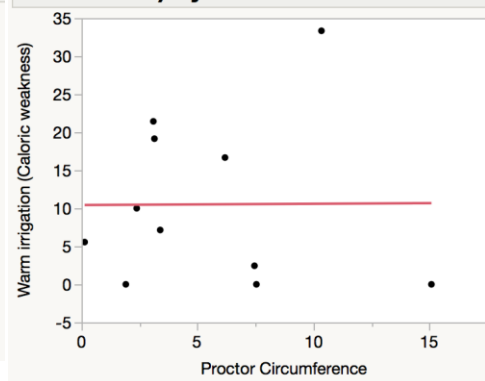

**Bivariate Fit of Warm irrigation (Caloric weakness) By Stimmer Diameter**

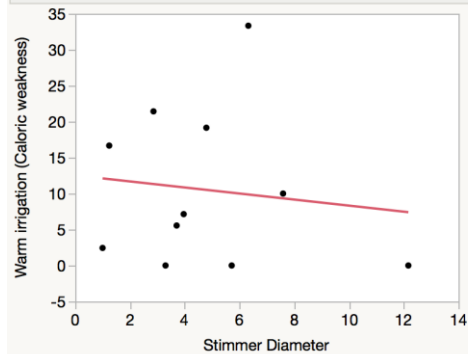

**Bivariate Fit of Warm irrigation (Caloric weakness) By Stimmer Circumference**

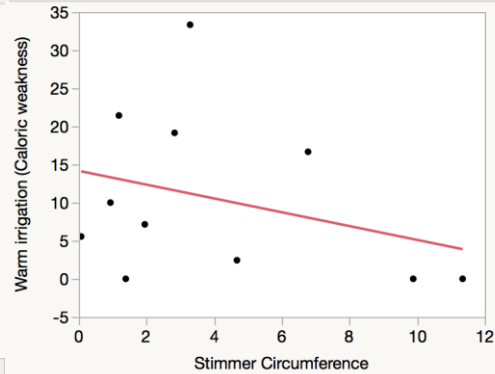

**Bivariate Fit of Warm irrigation (Caloric weakness) By |P-S| Diameter**

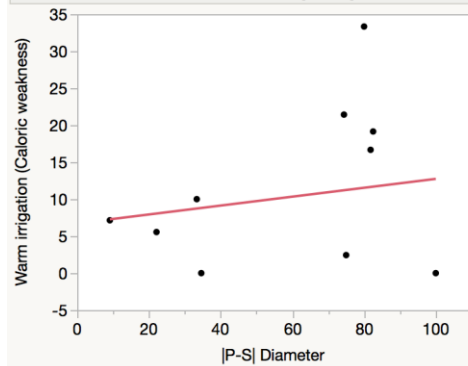

**Bivariate Fit of Warm irrigation (Caloric weakness) By |P-S| Circumference**

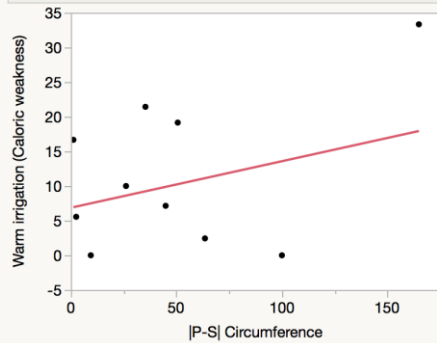

## Mastoid Bone

V

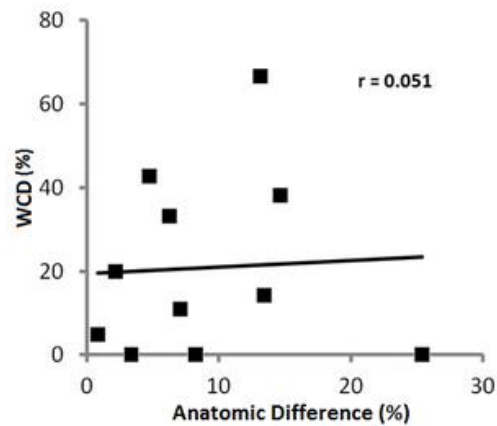

## Mastoid Airspaces

V

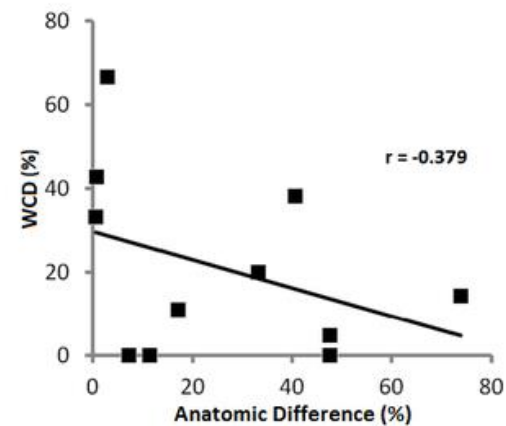

SA

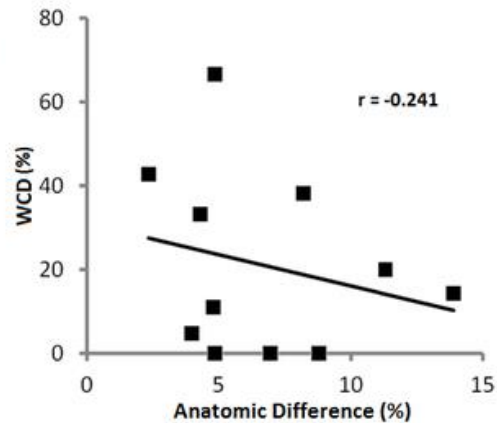

SA

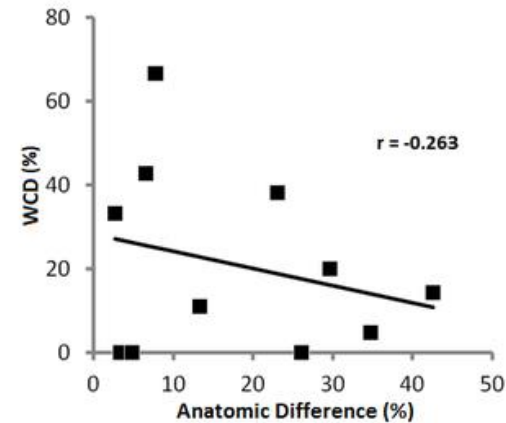

SA:V

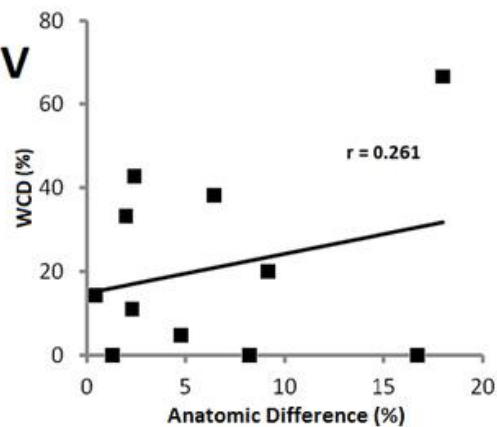

SA:V

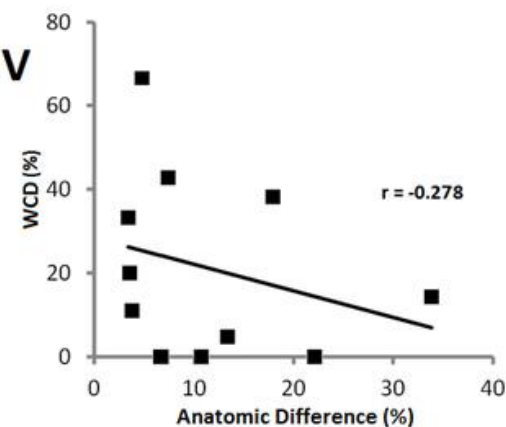

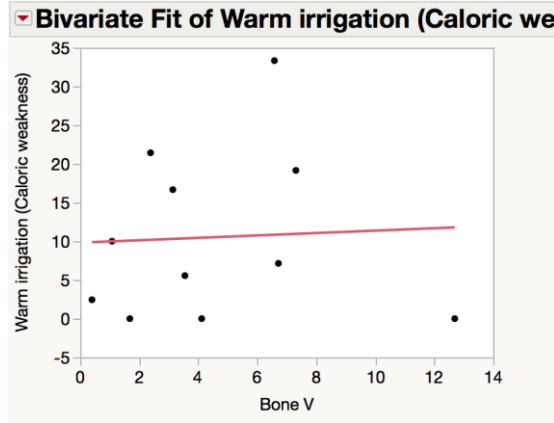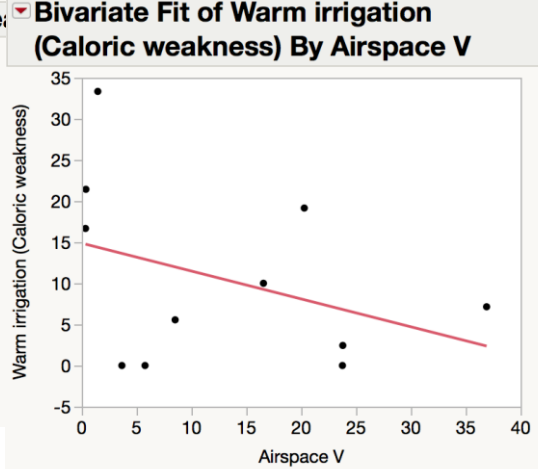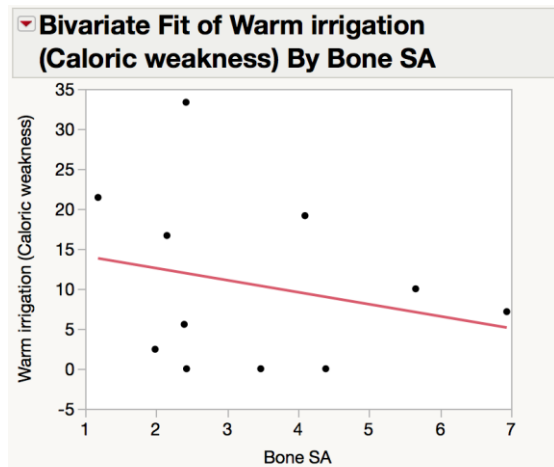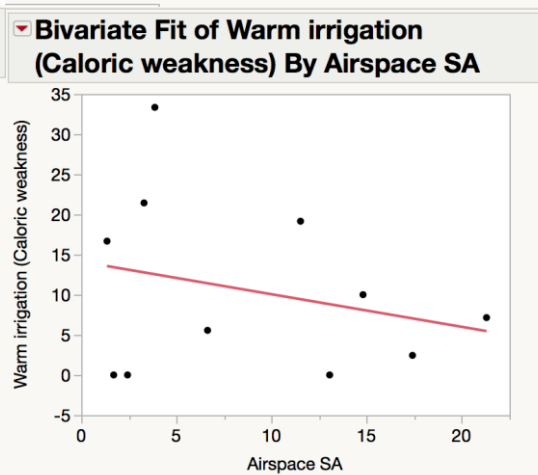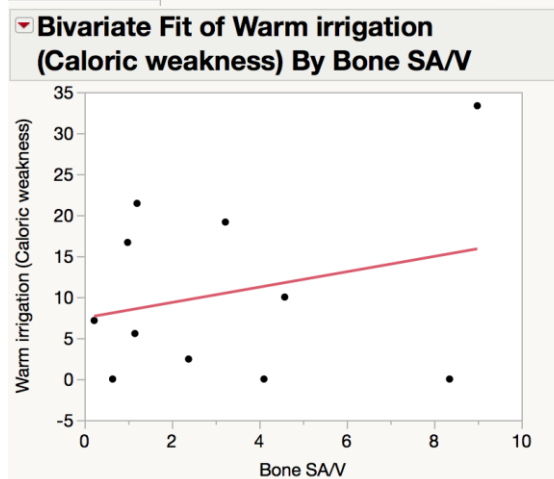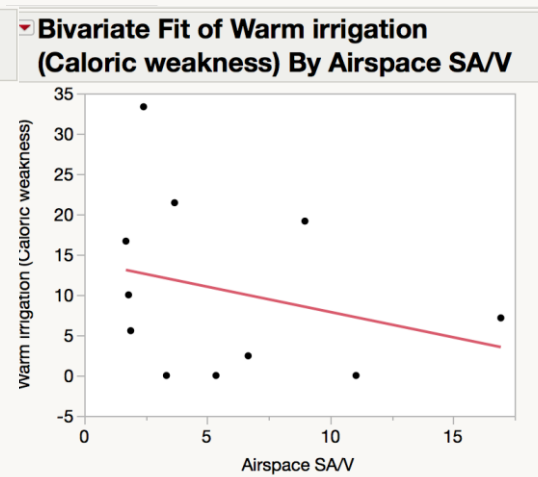

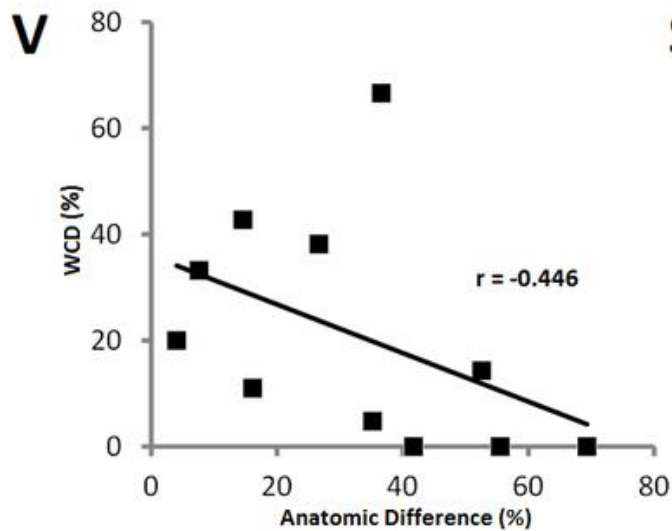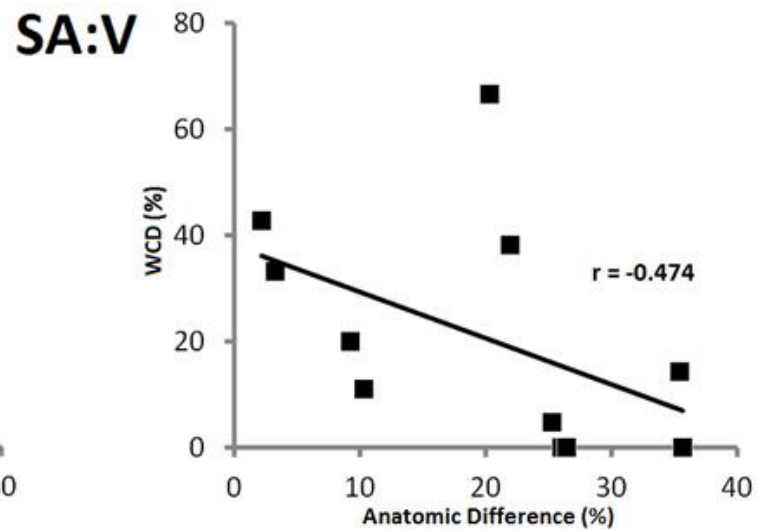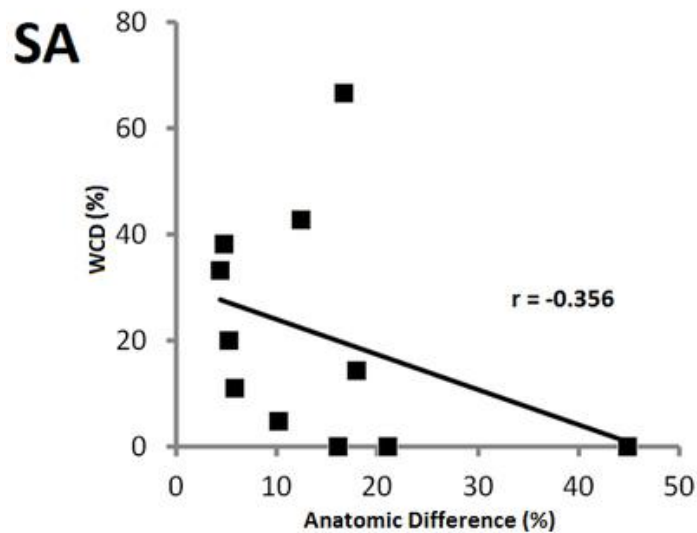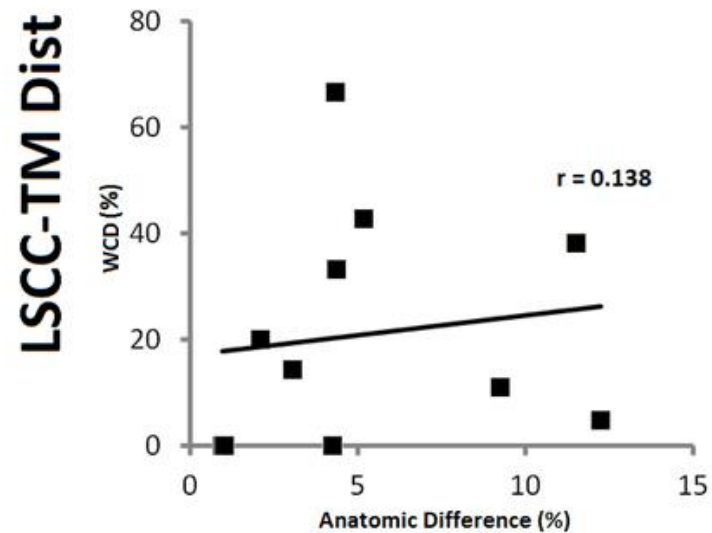

☒ **Bivariate Fit of Warm irrigation  
(Caloric weakness) By LSCC volume**

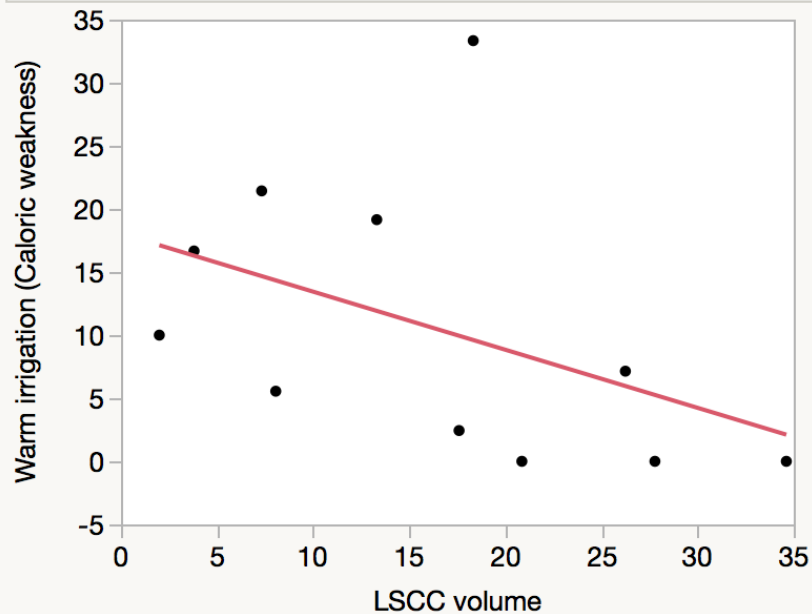

☒ **Bivariate Fit of Warm irrigation  
(Caloric weakness) By LSCC SA/V**

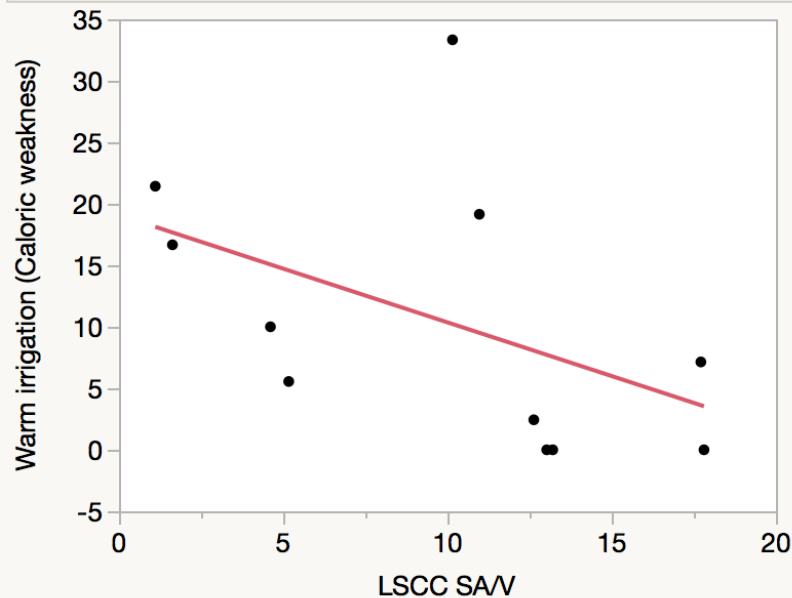

☒ **Bivariate Fit of Warm irrigation  
(Caloric weakness) By LSCC SA**

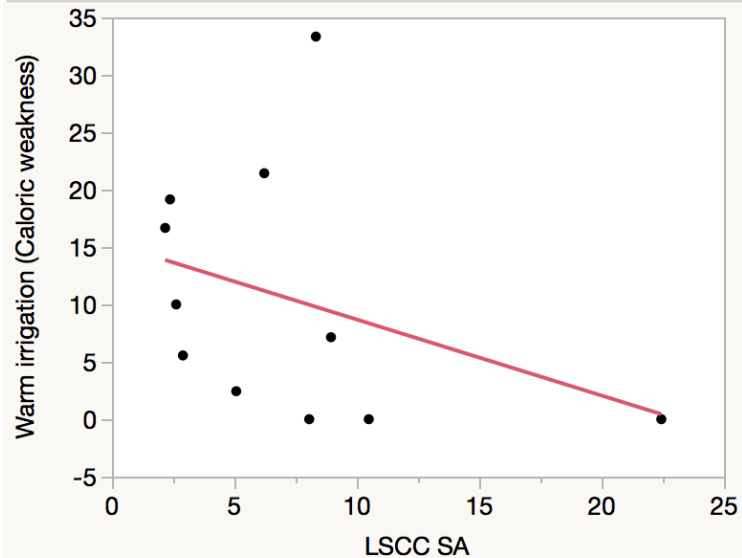

☒ **Bivariate Fit of Warm irrigation  
(Caloric weakness) By LSCC-TM distance**

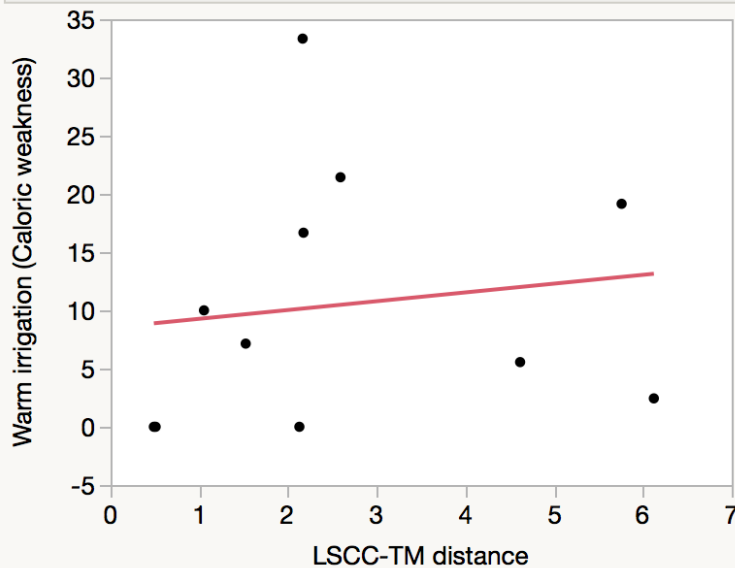

Supplement: Supplementary file 2 [file 1]
