# Supplementary material
Source: publisher figshare collection journal article supplement (https://asha.figshare.com/articles/dataset/_/5895988)
Supplement: Supplementary file 1 [file 1]

**Formula =  $| (L-R)/(0.5[L+R]) |$**

(Manuscript analysis)

| Factor                  | Variable                           | S1         | S2         | S4       | S6       |
|-------------------------|------------------------------------|------------|------------|----------|----------|
| Internal auditory canal | Proctor Circumference              | 6.2849162  | 15.0803461 | 0.265428 | 3.817804 |
|                         | Stimmer Circumference              | 5.66037736 | 19.7678509 | 0.136333 | 2.774083 |
|                         | P-S  Circumference                 | 101.25     | 18.8295165 | 5        | 200      |
|                         | Proctor Diameter                   | 29.6943231 | 27.2884283 | 15.68627 | 5.184175 |
|                         | Stimmer Diameter                   | 9.57746479 | 11.4285714 | 7.407407 | 6.593407 |
|                         | P-S  Diameter                      | 165.048544 | 69.1823899 | 44.21053 | 200      |
| Mastoid                 | Airspace V                         | 40.5632523 | 7.30936098 | 17.01987 | 47.51758 |
|                         | Airspace SA                        | 23.0411892 | 3.40612266 | 13.26964 | 26.10247 |
|                         | Airspace SA/V                      | 17.9412724 | 10.7088183 | 3.771531 | 22.1004  |
|                         | Bone V                             | 14.6214195 | 8.23209495 | 7.094715 | 25.39376 |
|                         | Bone SA                            | 8.1924318  | 6.94637068 | 4.789792 | 8.77815  |
|                         | Bone SA/V                          | 6.4482979  | 1.28756495 | 2.306883 | 16.70872 |
| Lateral                 | LSCC SA                            | 4.73933649 | 20.9764919 | 5.792164 | 16.1086  |
|                         | LSCC SA/V                          | 21.9392752 | 35.6167219 | 10.33295 | 26.04005 |
|                         | LSCC-TM distance                   | 11.5183246 | 4.25531915 | 9.230769 | 0.97561  |
|                         | LSCC volume                        | 26.6094421 | 55.5555556 | 16.10103 | 41.71123 |
| Caloric Output          | Warm irrigation (Caloric weakness) | 38.2978723 | 0          | 11.11111 | 0        |
|                         | Cold irrigation                    | 40         | N/A        | N/A      | N/A      |
|                         | Irrigation                         | Both       | Warm       | Warm     | Warm     |

## Statistical Analysis

|                         |                       | Manuscript  | Conventional |           |
|-------------------------|-----------------------|-------------|--------------|-----------|
| Anatomic Variable       |                       | Pearson's r | Pearson's r  | R squared |
| Internal auditory canal | Proctor Diameter      | 0.476       | 0.47580563   | 0.226391  |
|                         | Proctor Circumference | 0.007       | 0.00674389   | 4.55E-05  |
|                         | Stimmer Diameter      | -0.122      | -0.12243774  | 0.014991  |
|                         | Stimmer Circumference | -0.314      | -0.3141401   | 0.098684  |
|                         | (P-S) Diameter        | 0.177       | 0.17746549   | 0.031494  |
|                         | (P-S) Circumference   | 0.31        | 0.31017898   | 0.096211  |
| Mastoid                 | Bone Volume           | 0.051       | 0.05115662   | 0.002617  |
|                         | Bone Surface Area     | -0.241      | -0.24132758  | 0.058239  |
|                         | Bone SA:V             | -0.261      | -0.26090803  | 0.068073  |
|                         | Airspace Volume       | -0.379      | -0.37900396  | 0.143644  |
|                         | Airspace Surface Area | -0.263      | -0.26316725  | 0.069257  |
|                         | Airspace SA:V         | -0.278      | -0.27830559  | 0.077454  |

|              |                |        |             |          |
|--------------|----------------|--------|-------------|----------|
| Lateral      | Volume         | -0.446 | -0.44561867 | 0.198576 |
| Semicircular | Surface Area   | -0.356 | -0.35581034 | 0.126601 |
| Canal        | SA:V           | -0.474 | -0.47384597 | 0.22453  |
|              | Distance to TM | 0.138  | 0.13777155  | 0.018981 |

| Subjects |          |          |          |          |          |          |
|----------|----------|----------|----------|----------|----------|----------|
| S8       | S13      | S14      | S16      | S17      | S19      | S21      |
| 14.91375 | 20.68966 | 30.17508 | 4.756335 | 12.37293 | 6.19195  | 6.783145 |
| 9.345794 | 6.576402 | 22.68817 | 1.865837 | 13.55082 | 2.367383 | 3.899326 |
| 127.0588 | 329.8246 | 200      | 52.2293  | 2.352941 | 70.62706 | 89.79592 |
| 7.129456 | 56.05536 | 58.9313  | 1.290323 | 18.92393 | 54.69729 | 8.450704 |
| 1.996008 | 12.64368 | 24.3346  | 15.18152 | 2.479339 | 5.714286 | 7.920792 |
| 150      | 160      | 200      | 66.66667 | 163.6364 | 148.7805 | 18.18182 |
| 47.58144 | 2.91727  | 11.53165 | 33.11782 | 0.676079 | 0.747417 | 73.80161 |
| 34.80651 | 7.731564 | 4.862849 | 29.60888 | 2.706336 | 6.593407 | 42.5856  |
| 13.3267  | 4.817011 | 6.678165 | 3.597117 | 3.38226  | 7.339919 | 33.87786 |
| 0.794272 | 13.1655  | 3.361632 | 2.152947 | 6.276598 | 4.7663   | 13.43619 |
| 3.970076 | 4.841275 | 4.855756 | 11.31095 | 4.303123 | 2.36194  | 13.87789 |
| 4.763973 | 17.97813 | 8.214037 | 9.163582 | 1.974808 | 2.405037 | 0.443765 |
| 10.14617 | 16.6546  | 44.87278 | 5.240175 | 4.344049 | 12.43523 | 17.88856 |
| 25.25504 | 20.30445 | 26.40903 | 9.219427 | 3.253572 | 2.208963 | 35.42689 |
| 12.2449  | 4.329004 | 1.015228 | 2.105263 | 4.347826 | 5.181347 | 3.045685 |
| 35.17588 | 36.64921 | 69.23077 | 3.984064 | 7.594937 | 14.63415 | 52.48393 |
| 4.878049 | 66.66667 | 0        | 20       | 33.33333 | 42.85714 | 14.28571 |
| N/A      | 25       | 20       | N/A      | 47.61905 | 13.33333 | N/A      |
| Warm     | Both     | Both     | Warm     | Both     | Both     | Warm     |

**Formula =  $|(L-R)/(L+R)|$**   
 (Conventional Analysis)

| Factor                  | Variable                           | S1         | S2         | S4         | S6         |
|-------------------------|------------------------------------|------------|------------|------------|------------|
| Internal auditory canal | Proctor Circumference              | 3.1424581  | 7.54017305 | 0.132714   | 1.90890191 |
|                         | Stimmer Circumference              | 2.83018868 | 9.88392543 | 0.06816633 | 1.38704161 |
|                         | P-S  Circumference                 | 50.625     | 9.41475827 | 2.5        | 100        |
|                         | Proctor Diameter                   | 14.8471616 | 13.6442142 | 7.84313725 | 2.59208731 |
|                         | Stimmer Diameter                   | 4.78873239 | 5.71428571 | 3.7037037  | 3.2967033  |
|                         | P-S  Diameter                      | 82.5242718 | 34.591195  | 22.1052632 | 100        |
| Mastoid                 | Airspace V                         | 20.2816262 | 3.65468049 | 8.50993741 | 23.7587878 |
|                         | Airspace SA                        | 11.5205946 | 1.70306133 | 6.63481953 | 13.0512363 |
|                         | Airspace SA/V                      | 8.9706362  | 5.35440916 | 1.88576527 | 11.0501978 |
|                         | Bone V                             | 7.31070973 | 4.11604747 | 3.54735771 | 12.6968794 |
|                         | Bone SA                            | 4.0962159  | 3.47318534 | 2.39489607 | 4.38907506 |
|                         | Bone SA/V                          | 3.22414895 | 0.64378248 | 1.15344155 | 8.35436119 |
| Lateral                 | LSCC SA                            | 2.36966825 | 10.4882459 | 2.89608177 | 8.05429864 |
|                         | LSCC SA/V                          | 10.9696376 | 17.8083609 | 5.16647686 | 13.0200232 |
|                         | LSCC-TM distance                   | 5.7591623  | 2.12765957 | 4.61538462 | 0.48780488 |
|                         | LSCC volume                        | 13.304721  | 27.7777778 | 8.05051302 | 20.855615  |
| Caloric Output          | Warm irrigation (Caloric weakness) | 19.1489362 | 0          | 5.55555556 | 0          |
|                         | Cold irrigation                    | 20         | N/A        | N/A        | N/A        |
|                         | Irrigation                         | Both       | Warm       | Warm       | Warm       |

| Subjects   |            |            |            |            |            |            |
|------------|------------|------------|------------|------------|------------|------------|
| S8         | S13        | S14        | S16        | S17        | S19        | S21        |
| 7.45687257 | 10.3448276 | 15.0875386 | 2.37816764 | 6.18646529 | 3.09597523 | 3.39157246 |
| 4.6728972  | 3.28820116 | 11.344086  | 0.9329187  | 6.77540778 | 1.18369136 | 1.94966324 |
| 63.5294118 | 164.912281 | 100        | 26.1146497 | 1.17647059 | 35.3135314 | 44.8979592 |
| 3.56472795 | 28.0276817 | 29.4656489 | 0.64516129 | 9.4619666  | 27.348643  | 4.22535211 |
| 0.99800399 | 6.32183908 | 12.1673004 | 7.59075908 | 1.23966942 | 2.85714286 | 3.96039604 |
| 75         | 80         | 100        | 33.3333333 | 81.8181818 | 74.3902439 | 9.09090909 |
| 23.7907206 | 1.4586349  | 5.76582559 | 16.558908  | 0.33803937 | 0.37370851 | 36.9008043 |
| 17.4032565 | 3.86578209 | 2.43142439 | 14.8044403 | 1.35316785 | 3.2967033  | 21.2928008 |
| 6.66335085 | 2.40850529 | 3.33908231 | 1.79855858 | 1.69112986 | 3.66995966 | 16.9389317 |
| 0.39713617 | 6.58274896 | 1.68081619 | 1.07647349 | 3.1382991  | 2.38314991 | 6.71809634 |
| 1.98503812 | 2.4206376  | 2.42787825 | 5.65547496 | 2.15156174 | 1.18096998 | 6.93894447 |
| 2.38198651 | 8.98906298 | 4.10701844 | 4.58179085 | 0.98740408 | 1.20251837 | 0.22188247 |
| 5.07308684 | 8.32729906 | 22.4363917 | 2.62008734 | 2.17202433 | 6.21761658 | 8.94428152 |
| 12.6275221 | 10.1522256 | 13.204514  | 4.60971326 | 1.62678583 | 1.1044814  | 17.7134443 |
| 6.12244898 | 2.16450216 | 0.50761421 | 1.05263158 | 2.17391304 | 2.59067358 | 1.52284264 |
| 17.5879397 | 18.3246073 | 34.6153846 | 1.99203187 | 3.79746835 | 7.31707317 | 26.2419638 |
| 2.43902439 | 33.3333333 | 0          | 10         | 16.6666667 | 21.4285714 | 7.14285714 |
| N/A        | 12.5       | 10         | N/A        | 23.8095238 | 6.66666667 | N/A        |
| Warm       | Both       | Both       | Warm       | Both       | Both       | Warm       |
